# Supplementary material for: Phase separation-mediated actin bundling by the postsynaptic density condensates
Source: eLife journal article supplement (doi:10.7554/elife.84446), 2023-06-15
Supplement: supp [file Figure 1G.xlsx]

## Sheet: Figure 1G
F1	F2	F3	F4
0	15.981	0	18.312
0	15.32	0	23.367
0	20.591	0	9.607
0	12.824	0	11.715
0	9.763	0	10.521
