# Supplementary material for: Phase separation-mediated actin bundling by the postsynaptic density condensates
Source: eLife journal article supplement (doi:10.7554/elife.84446), 2023-06-15
Supplement: supp [file Figure 2D.xlsx]

## Sheet: Sheet1
C1	C2
8.458	0
19.091	0
15.265	0
15.323	0
15.675	0
