# Supplementary material for: Phase separation-mediated actin bundling by the postsynaptic density condensates
Source: eLife journal article supplement (doi:10.7554/elife.84446), 2023-06-15
Supplement: supp [file Figure 3C.xlsx]

## Sheet: Sheet1
Homer1-WT			homer1-R3E
Homer1	Shank3	GKAP	Homer1	Shank3	GKAP
0.77834	0.661856	0.681381	0.680387	0.595802	0.646354
0.779302	0.656597	0.71543	0.612518	0.545857	0.625721
0.799671	0.726103	0.743982	0.669271	0.670975	0.631111
0.747871	0.728944	0.765516	0.764904	0.723522	0.772884
0.75434	0.72424	0.756298	0.746392	0.714109	0.737309
0.731403	0.704477	0.736294	0.759144	0.730274	0.762288
