# Supplementary material for: Phase separation-mediated actin bundling by the postsynaptic density condensates
Source: eLife journal article supplement (doi:10.7554/elife.84446), 2023-06-15
Supplement: supp [file Figure 3E_3G.xlsx]

## Sheet: Figurer 3E
Homer1-WT	Homer1-R3E
13.652	3.519
17.735	6.199
22.222	7.521
16.896	3.625

## Sheet: Figure 3G
Homer1-WT	Homer1-R3E
20.497	3.342
19.118	0.536
21.354	1.849
20.179	2.073
