# Supplementary material for: Phase separation-mediated actin bundling by the postsynaptic density condensates
Source: eLife journal article supplement (doi:10.7554/elife.84446), 2023-06-15
Supplement: supp [file Figure 4B.xlsx]

## Sheet: Sheet1
-Homer1a	+Homer1a
13.652	4.401
17.735	2.921
22.222	4.034
16.896	2.826
	5.401
