# Supplementary material for: Phase separation-mediated actin bundling by the postsynaptic density condensates
Source: eLife journal article supplement (doi:10.7554/elife.84446), 2023-06-15
Supplement: supp [file Figure 4I.xlsx]

## Sheet: Sheet1
Homer3			Pi-Homer3
Homer3	Shank	GKAP	Pi-Homer3	Shank	GKAP
0.881904	0.773801	0.866315	0.674981	0.56156	0.658207
0.889551	0.772825	0.868944	0.628846	0.523939	0.607442
0.862119	0.768695	0.812367	0.619088	0.512255	0.638757
