# Supplementary material for: Phase separation-mediated actin bundling by the postsynaptic density condensates
Source: eLife journal article supplement (doi:10.7554/elife.84446), 2023-06-15
Supplement: supp [file Figure 4K.xlsx]

## Sheet: Sheet1
Homer3	Pi-Homer3
15.981	7.463
15.32	3.93
20.591	2.021
12.824	3.81
9.763	3.807
