# Supplementary material for: Phase separation-mediated actin bundling by the postsynaptic density condensates
Source: eLife journal article supplement (doi:10.7554/elife.84446), 2023-06-15
Supplement: supp [file Figure 5C.xlsx]

## Sheet: Sheet1
mCherry	Homer1-WT	Homer1-R3E	Homer1-R3E+EN
4.9372	23.1642	11.6174	19.9594
10.4342	29.0584	18.1484	27.009
13.8532	31.0696	19.7876	27.1768
21.106	38.8066	25.36	41.4288
