# Supplementary material for: Phase separation-mediated actin bundling by the postsynaptic density condensates
Source: eLife journal article supplement (doi:10.7554/elife.84446), 2023-06-15
Supplement: supp [file Figure 5H.xlsx]

## Sheet: Sheet1
pCAG-mCherry	pCAG-Homer-WT-mCherry	pCAG-Homer-3E-mCherry	pCAG-Homer-3EEN-mCherry
0.230469	0.611855	0.387681	0.500901
0.208075	0.62701	0.375796	0.6
0.20598	0.594855	0.400641	0.578073
