# Supplementary material for: Phase separation-mediated actin bundling by the postsynaptic density condensates
Source: eLife journal article supplement (doi:10.7554/elife.84446), 2023-06-15
Supplement: supp [file Figure 6C.xlsx]

## Sheet: Sheet1
mCherry	Homer1-WT	Homer1-R3E	Homer1-R3E+EN
0.539898	0.586991	0.354488	0.571051
0.414992	0.714051	0.880131	1.30007
0.326161	1.10082	1.0793	0.99541
0.26254	0.806397	0.950717	0.978307
0.288946			1.68192
	0.781627	0.277836
0.472854	0.814425	0.388655	0.985799
0.576168	1.80344	0.534728	1.61583
0.562017	1.49402		1.58231
		0.736164	1.1035
0.31349	1.41965	0.71036	0.883356
0.238785	0.926387	0.685144
0.382	1.43445	0.612467	1.09536
0.516949	0.772541		0.863459
	0.660786		1.34545
			0.879412
0.829573	1.26283	0.670567	2.10671
0.651382	0.753784	0.833024	1.12452
0.548696	0.83055	0.654744	0.625031
0.720869	1.48446	0.555998	1.296
0.451579	0.598576		0.848748
0.53257		0.549017	1.15564
0.702438	0.969597	0.87311
	1.19155	0.80917	0.981494
0.633409	1.28831	0.893981	1.12929
0.714949	0.869703		1.61358
0.91111	1.24459	0.742424	0.524658
0.813817	0.994161	0.545697	1.29263
0.914514	0.988477	0.883864
		0.405676	1.24425
0.706702	0.623576		0.910438
0.530002	0.437305		2.43339
0.692613	0.962527		0.852334
0.561981	0.638928		0.588592
0.607635			0.961411
0.593206
0.62619
0.598216	0.813141	0.641807	1.59108
0.688945	2.11491	0.967828	1.1486
0.82199	1.58406	0.558605	1.8001
0.567422	0.706436	0.755547	1.19187
		1.31451
0.754941	0.716738		1.45082
0.914055	1.87464	0.676654	1.49179
0.560493	0.829019	0.529431	2.05388
0.505301	1.17605	0.769998	2.09953
		0.780753	1.06598
0.501561	0.833207	0.842972
0.621054	1.52405		1.71372
0.563502	0.678306	0.9324	1.59654
0.726776	1.67697	1.04668	1.0699
		0.920216	1.22547
		0.940654
