# Supplementary material for: Phase separation-mediated actin bundling by the postsynaptic density condensates
Source: eLife journal article supplement (doi:10.7554/elife.84446), 2023-06-15
Supplement: supp [file Figure 6D.xlsx]

## Sheet: Sheet1
Homer1-WT	Homer1-R3E	Homer1-R3E+EN	mCherry
0.467432	0.300248	0.479555	0.330831
0.434886	0.317659	0.476816	0.368086
0.512859	0.417594	0.459461	0.299607
0.464893	0.342812	0.412498	0.368925
0.459175	0.282123	0.476315	0.396867
0.38698	0.263307	0.42278	0.279032
0.563402	0.254678	0.50031	0.365769
0.404813	0.29779	0.45303	0.350429
0.463534	0.341339	0.494596	0.302648
0.430592	0.294627	0.476703	0.339107
0.420127	0.353278	0.40389	0.353962
0.421827		0.459648	0.3061
0.375703		0.335148
		0.389134
0.4662	0.3709	0.4511	0.3879
0.5764	0.4324	0.4358	0.4391
0.4267	0.2991	0.4477	0.3937
0.4323	0.3976	0.403	0.4033
0.4752	0.3775	0.4206	0.347
0.4376	0.451	0.5335	0.4222
0.4666	0.3875	0.5636	0.4175
0.512	0.4871	0.5131	0.3905
0.3542	0.3101	0.495	0.4669
0.492	0.311	0.423	0.4666
0.4754	0.3814	0.466	0.3849
0.6069	0.2429	0.5499	0.4284
0.4524		0.5507	0.388
0.4201		0.572	0.3819
0.4967		0.5121	0.393
0.5181		0.4927	0.3661
			0.4257
			0.457
			0.3946
0.399434	0.337593	0.347393	0.500178
0.472727	0.395021	0.392393	0.417883
0.497728	0.456723	0.384658	0.635561
0.471797	0.475698	0.422204	0.425467
0.470285	0.480446	0.302408	0.482852
0.557891	0.416712	0.334026	0.466345
0.46305	0.337094	0.338597	0.545962
0.497794	0.389712	0.368976	0.554093
0.42677	0.382622	0.370103	0.446692
0.543826	0.410737	0.415432	0.419882
0.485822	0.357168	0.38561	0.513411
0.456775	0.385913	0.389399	0.468828
		0.42027	0.513016
		0.432581
