# Supplementary material for: Phase separation-mediated actin bundling by the postsynaptic density condensates
Source: eLife journal article supplement (doi:10.7554/elife.84446), 2023-06-15
Supplement: supp [file Figure1 figure supplement 2B.xlsx]

## Sheet: Sheet1
+3xPSD	+CaMKIIB
8.458	2.419
19.091	3.772
15.265	4.351
15.323	4.68
15.675	4.936
